# Supplementary material
Source: MDPI journal article supplement (https://www.mdpi.com/2073-4395/12/5/1215)
Supplement: s1 [file s1]

**Supplementary material for:**

***In vitro* induction and primary evaluation of octoploid plants in Saskatoon berry (*Amelanchier alnifolia* Nutt.)**

Danuta Kucharska<sup>1</sup>, Małgorzata Podwyszyńska<sup>1</sup>, Aleksandra Trzewik<sup>1</sup>, Agnieszka Marasek-Ciołakowska<sup>1</sup>, Stanisław Pluta<sup>2</sup>, Łukasz Seliga<sup>2</sup>

<sup>1</sup> Department of Applied Biology, The National Institute of Horticultural Research, Konstytucji 3 Maja 1/3 Street, 96-100 Skierniewice,

<sup>2</sup> Department of Breeding, The National Institute of Horticultural Research, Konstytucji 3 Maja 1/3 Street, 96-100 Skierniewice,

\* Correspondence: danuta.kucharska@inhort.pl

**Contents**

**Figure S1.** Chromosome counts of *Amelanchier* genotypes. **a.** 'Smoky' ( $2n = 4x = 68$ ). **b.** 'Smoky' S 8-1 ( $2n = 8x = 136$ ). **c.** 'Smoky' S 8-2 ( $2n = 8x = 136$ ). **d.** 'Martin' ( $2n = 4x = 68$ ). **e.** 'Martin' M 8x-1 ( $2n = 8x = 136$ ). **f.** 'Martin' M 8x-2 ( $2n = 8x = 136$ ). **g.** 'Martin' M 8x-3 ( $2n = 8x = 136$ ). **h.** 'Martin' M 8x-4 ( $2n = 8x = 136$ ). Bars represent 5  $\mu$ m.

**Figure S2.** Histograms of nuclear DNA / ploidy level estimation using flow cytometry (FCM-PI) with internal standards: *Solanum lycopersicum* (2C DNA = 1.96 pg) for the *Amelanchier alnifolia* genotypes. **a.** 'Smoky' control plant S4x (2C DNA = 2.28 pg). **b.** 'Smoky' S 8-1 (2C DNA = 4.60 pg). **c.** 'Smoky' S 8-2 (2C DNA = 4.64 pg). **d.** 'Martin' control 4x (2C DNA = 2.29 pg). **e.** 'Martin' M 8x-1 (2C DNA = 4.55 pg). **f.** 'Martin' M 8x-2 (2C DNA = 4.63 pg). **g.** 'Martin' M 8x-3 (2C DNA = 4.57 pg). **h.** 'Martin' M 8x-4 (2C DNA = 4.56 pg).

**Table S1.** Stages of obtaining, micropropagation, rooting and acclimatization of Saskatoon berry octoploids

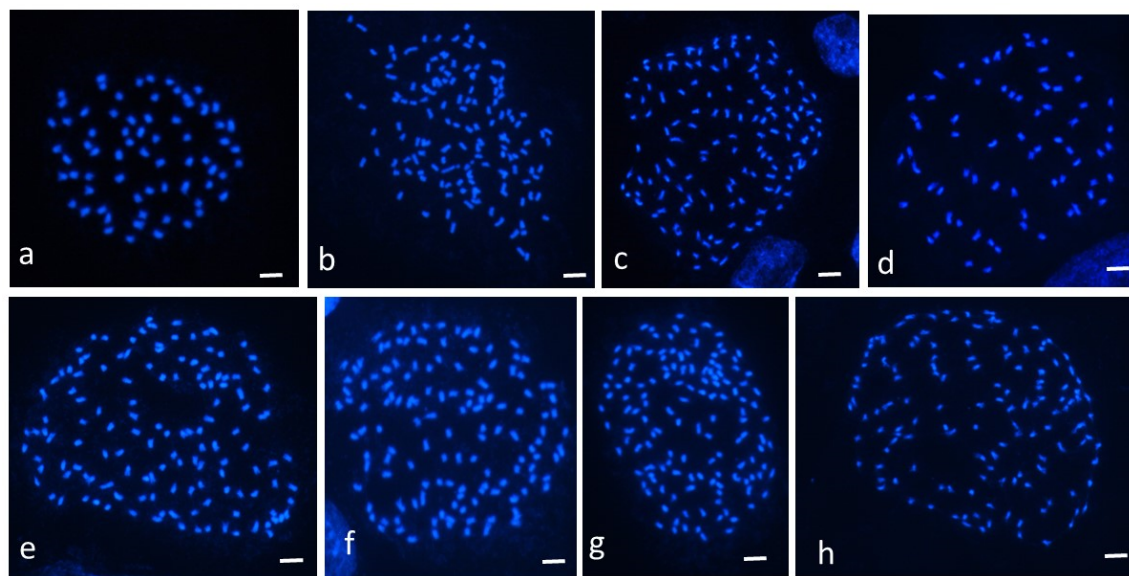

**Figure S1.** Chromosome counts of *Amelanchier* genotypes. **a.** 'Smoky' ( $2n = 4x = 68$ ). **b.** 'Smoky' S 8-1 ( $2n = 8x = 136$ ). **c.** 'Smoky' S 8-2 ( $2n = 8x = 136$ ). **d.** 'Martin' control ( $2n = 4x = 68$ ). **e.** 'Martin' M 8x-1 ( $2n = 8x = 136$ ). **f.** 'Martin' M 8x-2 ( $2n = 8x = 136$ ). **g.** 'Martin' M 8x-3 ( $2n = 8x = 136$ ). **h.** 'Martin' M 8x-4 ( $2n = 8x = 136$ ). Bars represent 5  $\mu$ m.

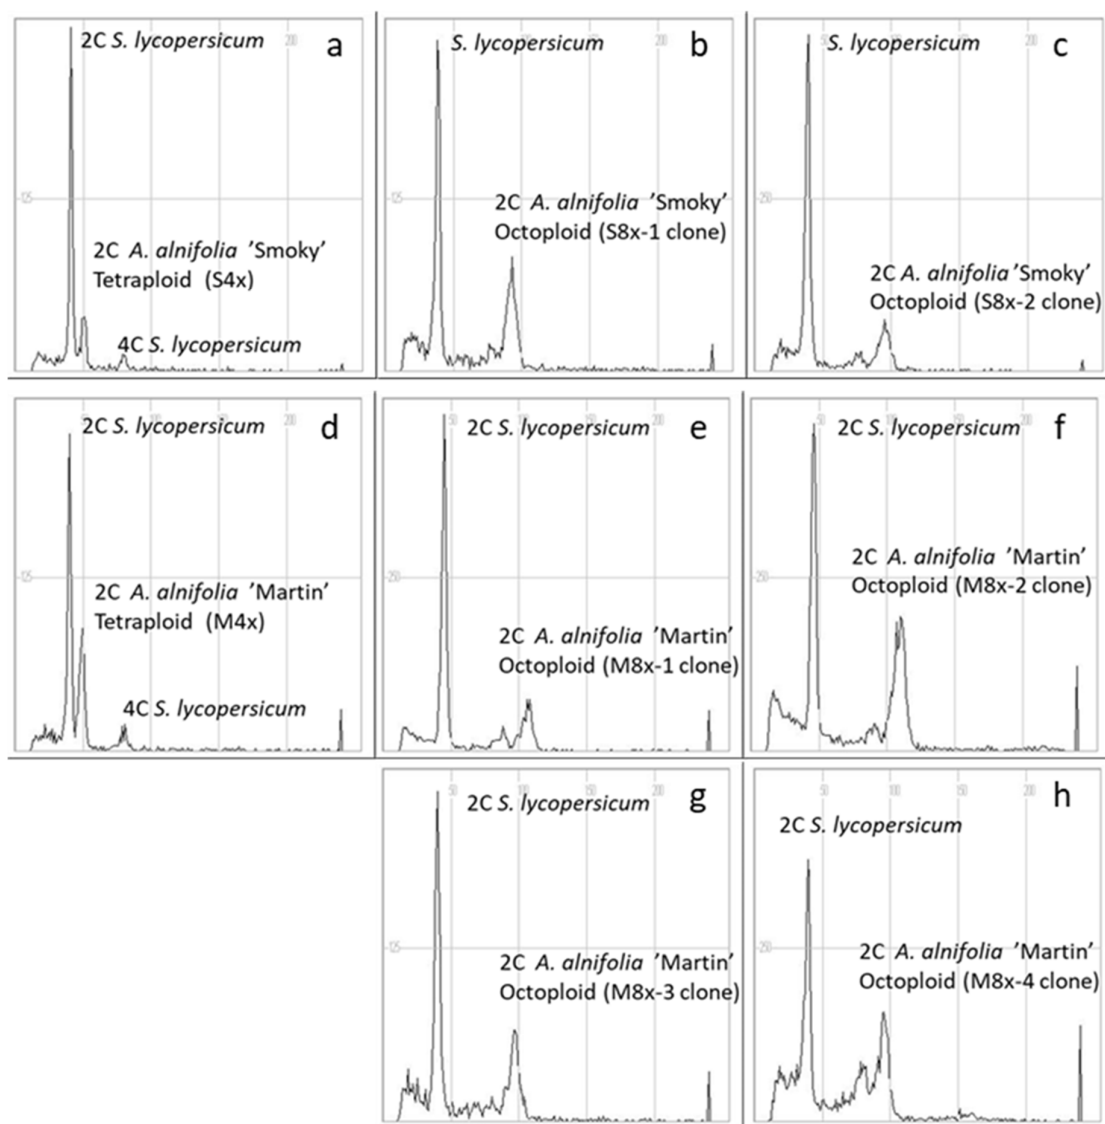

**Figure S2.** Histograms of nuclear DNA / ploidy level estimation using flow cytometry (FCM-PI) with internal standards: *Solanum lycopersicum* (2C DNA = 1.96 pg) for the *Amelanchier alnifolia* genotypes. **a.** 'Smoky' control plant S4x (2C DNA = 2.28 pg). **b.** 'Smoky' S 8-1 (2C DNA = 4.60 pg). **c.** 'Smoky' S 8-2 (2C DNA = 4.64 pg). **d.** 'Martin' control 4x (2C DNA = 2.29 pg). **e.** 'Martin' M 8x-1 (2C DNA = 4.55 pg). **f.** 'Martin' M 8x-2 (2C DNA = 4.63 pg). **g.** 'Martin' M 8x-3 (2C DNA = 4.57 pg). **h.** 'Martin' M 8x-4 (2C DNA = 4.56 pg).

**Table S1.** Stages of obtaining, micropropagation, rooting and acclimatization of Saskatoon berry octoploids.

| No | Stage                                  | Media<br>(mg L <sup>-1</sup> )                                                                                                                                                                                                                                                                            | Duration and conditions<br>of the subcultures                                                         |
|----|----------------------------------------|-----------------------------------------------------------------------------------------------------------------------------------------------------------------------------------------------------------------------------------------------------------------------------------------------------------|-------------------------------------------------------------------------------------------------------|
| 1. | Micropropagation of<br>Saskatoon berry | <u>Basic medium (BM)</u> :<br>MS (salts and vitamins),<br>325 CaCl <sub>2</sub> ,<br>175 MgSO <sub>4</sub> ,<br>1.0 BA,<br>1.0 GA <sub>3</sub> ,<br>0.1 IAA,<br>30 g L <sup>-1</sup> sucrose,<br>6 g L <sup>-1</sup> plant agar (Duchefa), pH 5.6                                                         | 4 weeks<br><u>standard conditions (SC)</u> : growth room,<br>23 °C,<br>16 h photoperiod               |
| 2. | Induction of octoploids                | BM supplemented antimetabolites:<br>colchicine 125, 250,<br>trifluralin 50, 100,<br>oryzalin 5, 10,<br>APM 5, 10,<br>the control - BM                                                                                                                                                                     | 2 weeks<br>(6 days in the darkness,<br>8 days in SC)                                                  |
| 3. | Detection of octoploids                | 1 <sup>st</sup> subculture - BM<br>2 <sup>nd</sup> subculture - BM                                                                                                                                                                                                                                        | 4 weeks in SC<br>4 weeks in SC (checking the ploidy of all<br>regenerated shoots by flow cytometry).  |
| 4. | Micropropagation of<br>octoploids      | BM                                                                                                                                                                                                                                                                                                        | 4 weeks in SC (confirmation of octoploid status<br>of shoots)                                         |
| 5. | Cooling of octoploids                  | BM                                                                                                                                                                                                                                                                                                        | 1-3 months<br>cold room,<br>4 °C,<br>darkness                                                         |
| 6. | <i>In vitro</i> rooting of octoploids  | <u>Stage I</u> : ½ MS salts and vitamins,<br>1.0 IBA,<br>30 g L <sup>-1</sup> sucrose,<br>6 g L <sup>-1</sup> plant agar, pH 5.6;<br><u>Stage II</u> : ½ MS salts and vitamin,<br>4 g L <sup>-1</sup> active carbon (Duchefa),<br>30 g L <sup>-1</sup> sucrose,<br>6 g L <sup>-1</sup> plant agar, pH 5.6 | five days in darkness<br><br>4 weeks in SC                                                            |
| 7. | Acclimatization of<br>octoploids       | shading and keeping high humidity<br><br>spraying 10 GA <sub>3</sub><br>foliar fertilization 0.4% Npk 18-18-18<br>(Kristalon Yara Poland)                                                                                                                                                                 | greenhouse, during the first 3 weeks,<br>the next day after planting,<br>from the 10th day every week |
